# Supplementary material
Source: PubMed Central journal article supplement (PMC8041387)
Supplement: mmc1.pdf [file mmc1.pdf]

# THE LANCET

## Global Health

### Supplementary appendix 1

This translation in Vietnamese was submitted by the authors and we reproduce it as supplied. It has not been peer reviewed. *The Lancet's* editorial processes have only been applied to the original in English, which should serve as reference for this manuscript.

Bản dịch sang tiếng Việt này do các tác giả gửi và chúng tôi sao chép lại như đã cung cấp. Bản dịch này không qua phản biện. Quy trình biên tập của *The Lancet* chỉ áp dụng cho bản gốc bằng tiếng Anh, và độc giả chỉ nên dùng bản gốc tiếng Anh làm tài liệu tham khảo.

Supplement to: Pham QD, Stuart RM, Nguyen TV, et al. Estimating and mitigating the risk of COVID-19 epidemic rebound associated with reopening of international borders in Vietnam: a modelling study. *Lancet Glob Health* 2021; published online April 12. [http://dx.doi.org/10.1016/S2214-109X\(21\)00103-0](http://dx.doi.org/10.1016/S2214-109X(21)00103-0).

## Tóm tắt

**Bối cảnh** Việt Nam xuất hiện như một trong số các câu chuyện thành công nhất trong việc đáp ứng với COVID-19 trên thế giới. Sau khoảng thời gian dài không có sự lây truyền hay sự lây truyền ở mức thấp, một đợt bùng phát dịch không rõ nguồn gốc xảy ra tại Đà Nẵng vào tháng 7 năm 2020, nhưng dịch đã nhanh chóng được khống chế. Chúng tôi sử dụng các dữ liệu về dịch tễ, hành vi, dân số và chính sách đáp ứng từ vụ dịch Đà Nẵng nhằm hiệu chuẩn mô hình đa tác nhân về sự lây lan COVID-19 của Việt Nam và ước tính nguy cơ các vụ dịch trong tương lai liên quan đến việc mở lại đi lại quốc tế tại quốc gia này.

**Phương pháp** Trong nghiên cứu mô hình hóa này, chúng tôi sử dụng dữ liệu đầy đủ từ 15 tháng 6 đến 15 tháng 10 năm 2020 về xét nghiệm, các trường hợp mắc và các trường hợp không tuân thủ cách ly để xây dựng mô hình đa tác nhân về sự lây truyền COVID-19 nhằm mô phỏng vụ dịch COVID-19 tại Đà Nẵng vào tháng 7 năm 2020. Chúng tôi áp dụng mô hình này để ước lượng nguy cơ các vụ dịch khác trong tương lai tại Việt Nam trong 3 tháng sau khi mở cửa biên giới đi lại quốc tế, với các kịch bản khác nhau về hành vi, chính sách đáp ứng (ví dụ như đóng cửa trường học và nơi làm việc) và việc xét nghiệm trong thời gian tới.

**Kết quả** Chúng tôi ước tính rằng đợt bùng phát dịch tại Đà Nẵng từ tháng 7 đến tháng 8 năm 2020 đã đưa đến sự lây truyền đáng kể trong cộng đồng và tỷ lệ xét nghiệm cao hơn cho người có biểu hiện triệu chứng có thể giảm thiểu sự lây truyền này. Chúng tôi ước tính đỉnh dịch xảy ra vào ngày 2 tháng 8 năm 2020 với số ca nhiễm hoạt động ước tính là 1060 (khoảng dự đoán 95%: 890–1280). Nếu người dân tại Việt Nam vẫn tiếp tục tuân thủ cao việc đeo khẩu trang, các dự báo của chúng tôi cho thấy dịch bệnh sẽ vẫn được kiểm soát ngay cả khi định kỳ có một số ít ca nhiễm xâm nhập và thoát khỏi cách ly vào cộng đồng. Tuy nhiên, nếu sự chú quan tăng lên và tỷ lệ xét nghiệm tương đối thấp (10% những người có triệu chứng được xét nghiệm), dịch có thể tái bùng phát, với ước tính số ca nhiễm trong 3 tháng là 2100 (khoảng dự đoán 95%: 1050–3610). Các hậu quả này có thể được giảm đi nếu người dân thay đổi hành vi một cách linh hoạt, tương ứng với sự gia tăng số ca nhiễm trong cộng đồng vượt ngưỡng nhất định, nhưng chỉ khi việc xét nghiệm cũng tăng lên cho người có biểu hiện triệu chứng.

**Phiên giải** Thành công của việc kiểm soát COVID-19 tại Việt Nam có thể còn lớn hơn nếu tăng tỷ lệ xét nghiệm người có biểu hiện triệu chứng. Nếu các biện pháp đáp ứng nhanh vẫn được duy trì, thì dịch bệnh vẫn sẽ được kiểm soát ngay cả khi có sự hiện diện ở mức thấp của ca xâm nhập.

**Tài trợ** Bộ Khoa học và Công nghệ (Việt Nam).

**Tác quyền** © 2021 Các tác giả. Xuất bản bởi Elsevier Ltd. Đây là bài báo truy cập mở được cấp phép theo CC BY-NC-ND 4.0.
